# Supplementary material for: Gold nanoparticles-oxidized multi-walled carbon nanotubes as electrochemiluminescence immunosensors
Source: Royal Society of Chemistry journal article supplement (doi:10.1039/d2an00661h), 2022-01-01
Supplement: d2an00661h1.pdf [file d2an00661h1.pdf]

Supplementary Information (SI) for Analyst.

## Gold nanoparticles-oxidized multi walled carbon nanotubes as Electrochemiluminescence immunosensor

Ruina Wang<sup>a</sup>, Yun Huang<sup>b</sup> and Yuwu Chi<sup>b\*</sup>

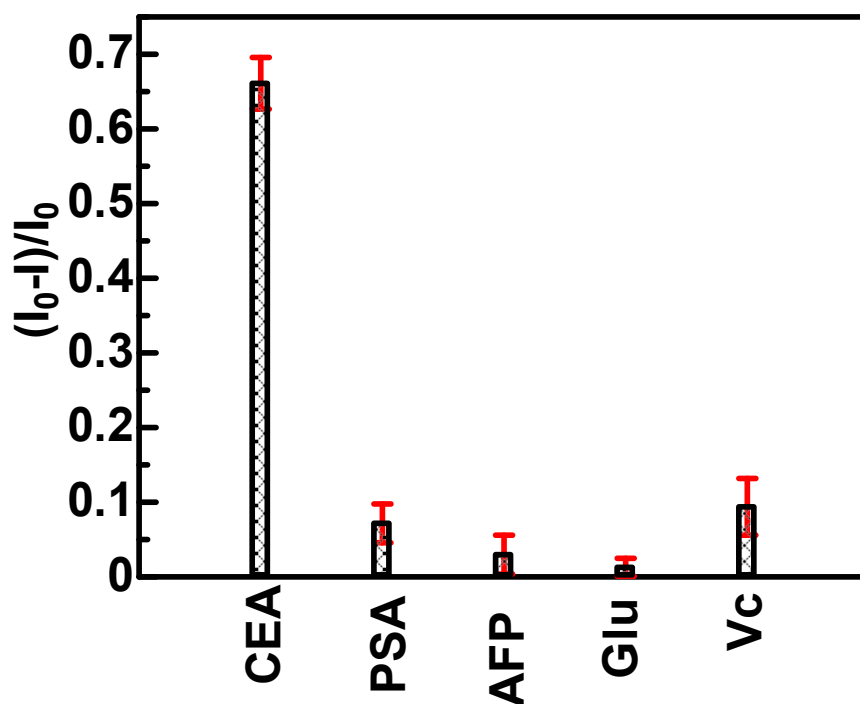

Figure S1 The selectivity of the present immunosensor

Table S1 Recovery test of CEA in human serum (n=3)

| Sample | Spiked (ng / mL) | Detected (ng / mL) | Recovery (%) |
|--------|------------------|--------------------|--------------|
| S1     | 25               | 24.7               | 98.6         |
| S2     | 50               | 53.4               | 106.7        |
| S3     | 100              | 92.1               | 92.1         |
